# Supplementary material for: Differential response of linear and angular psoralens in PUVA-induced apoptosis in HL-60 cells
Source: Royal Society of Chemistry journal article supplement (doi:10.1039/b313729e), 2004-03-01
Supplement: b313729e.doc [file b313729e.doc]

SUPPLEMENTARY INFORMATIONS

Differential response of linear and angular psoralens in PUVA-induced apoptosis in HL-60 cells.

Giampietro Viola,*,a Laura Facciolo,a Daniela Vedaldi,a,, Silvia Disarò b Giuseppe Basso b, Francesco Dall’Acqua a

[a] Department of Pharmaceutical Sciences, University of Padova, via Marzolo 5, University of Padova, Italy, giampietro.viola.1@unipd.it

[b] Department of Pediatry, University of Padova, via Giustiniani 3, University of Padova, Italy.

**Materials**

The 5-methoxy psoralen (5-MOP) was exctracted from fig leaves. 8-methoxy psoralen was purchased from Chinoin (Milano, Italy). Angelicin was purchased from Franco Indian Chem. Co. (Bombay, India), and 4,6,4’ trimethyl angelicin was synthetised according to Guiotto et al.

Caspase-3 and Caspase-8 activities were measured using two commercial kits purchased from Sigma Co. and the recommended protocols were followed.

**Figure S1**

Cell cycle analysis of HL-60 cells treated with increasing concentrations of 8-MOP in combination with 1.25 J cm-2 of UVA dose. Cells were analysed after 24 h from the PUVA treatment with the flow cytometer as described. Panel A=Control; Panel B= Irradiated control; Panel C= 1.25 M; Panel D= 2.5 M; Panel E=5 M; Panel F= 10 M.

**Figure S2**

Cell cycle analysis of HL-60 cells treated with increasing concentrations of TMA in combination with 1.25 J cm-2 of UVA dose. Cells were analysed after 24 h from the PUVA treatment with the flow cytometer as described. Panel A=Control; Panel B= Irradiated control; Panel C= 0.3 M; Panel D= 0.625 M; Panel E=1.25 M; Panel F= 2.5 M; Panel G= 5 M; Panel F =10 M.

# Figure S3

Cell cycle analysis of HL-60 cells treated with 2.5 M of 5-MOP and 8-MOP respectively, in combination with 1.25 J cm-2 of UVA dose. Panel A= 5-MOP after 24 h from the irradiation; Panel B = 5-MOP after 48 h from the irradiation; Panel C = 8-MOP after 24 h from the irradiation; Panel D 8-MOP after 48 h from the irradiation.

**Figure S4**

IETD-pNA cleaving activity. HL-60 cells were exposed to 1.25 J cm-2 in the presence of increasing concentrations of test compounds. After 24 h cells were harvested and the lysates were assayed for caspase-3 activity using the caspase-8 substrate IETD. Panel A= 5-MOP; Panel B= 8-MOP; Panel C= ANG Panel D = TMA. White bars, irradiated controls Data shown is average of at least three independent experiments with error bar denoting standard error.


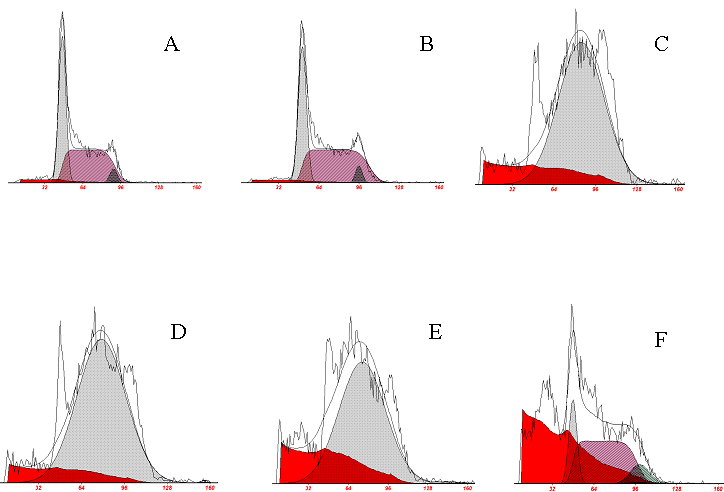


Figure S1


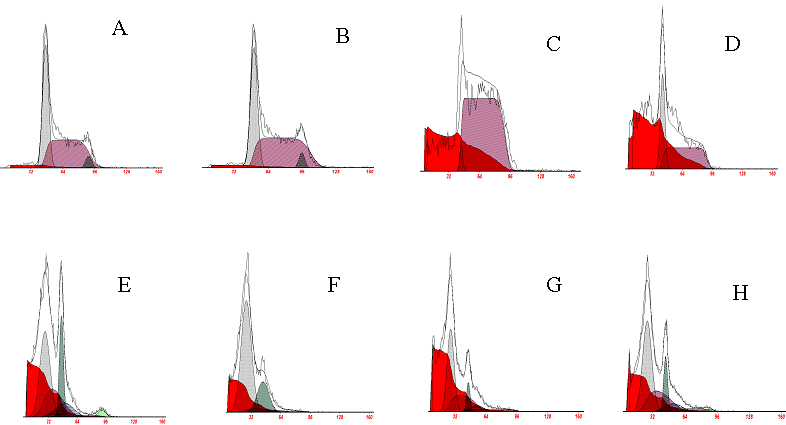


Figure S2

**C**
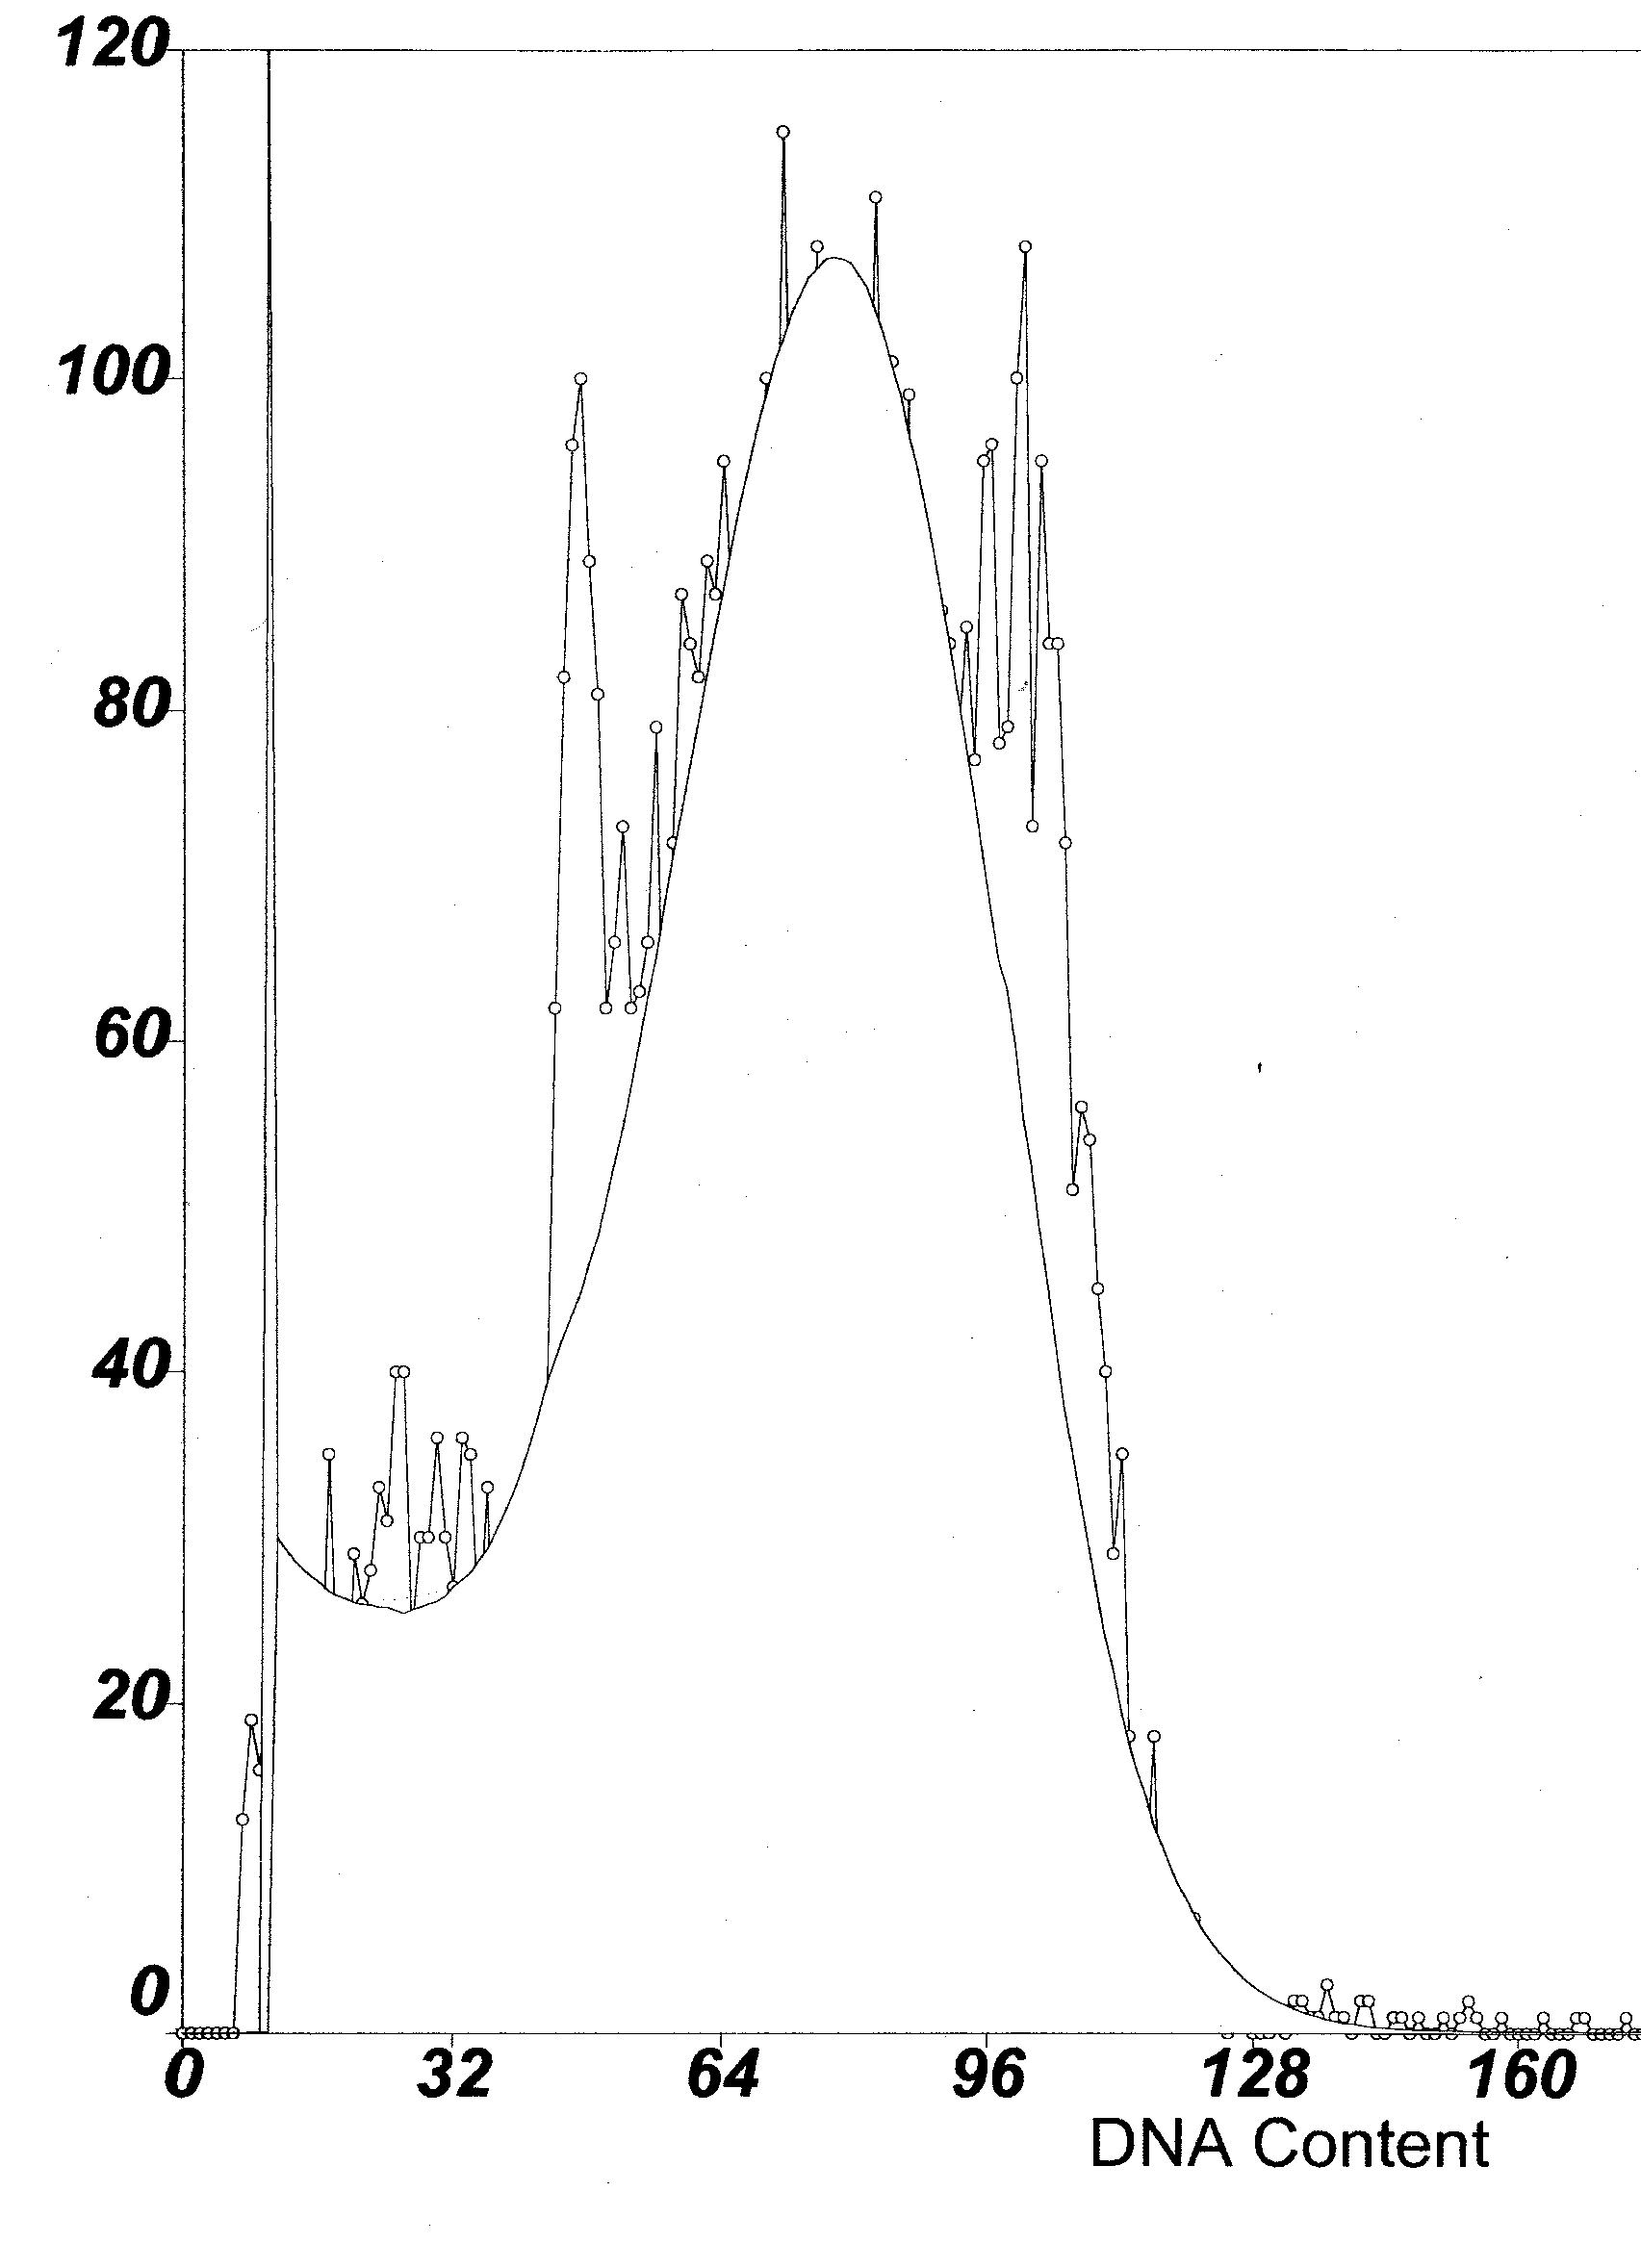


**A**
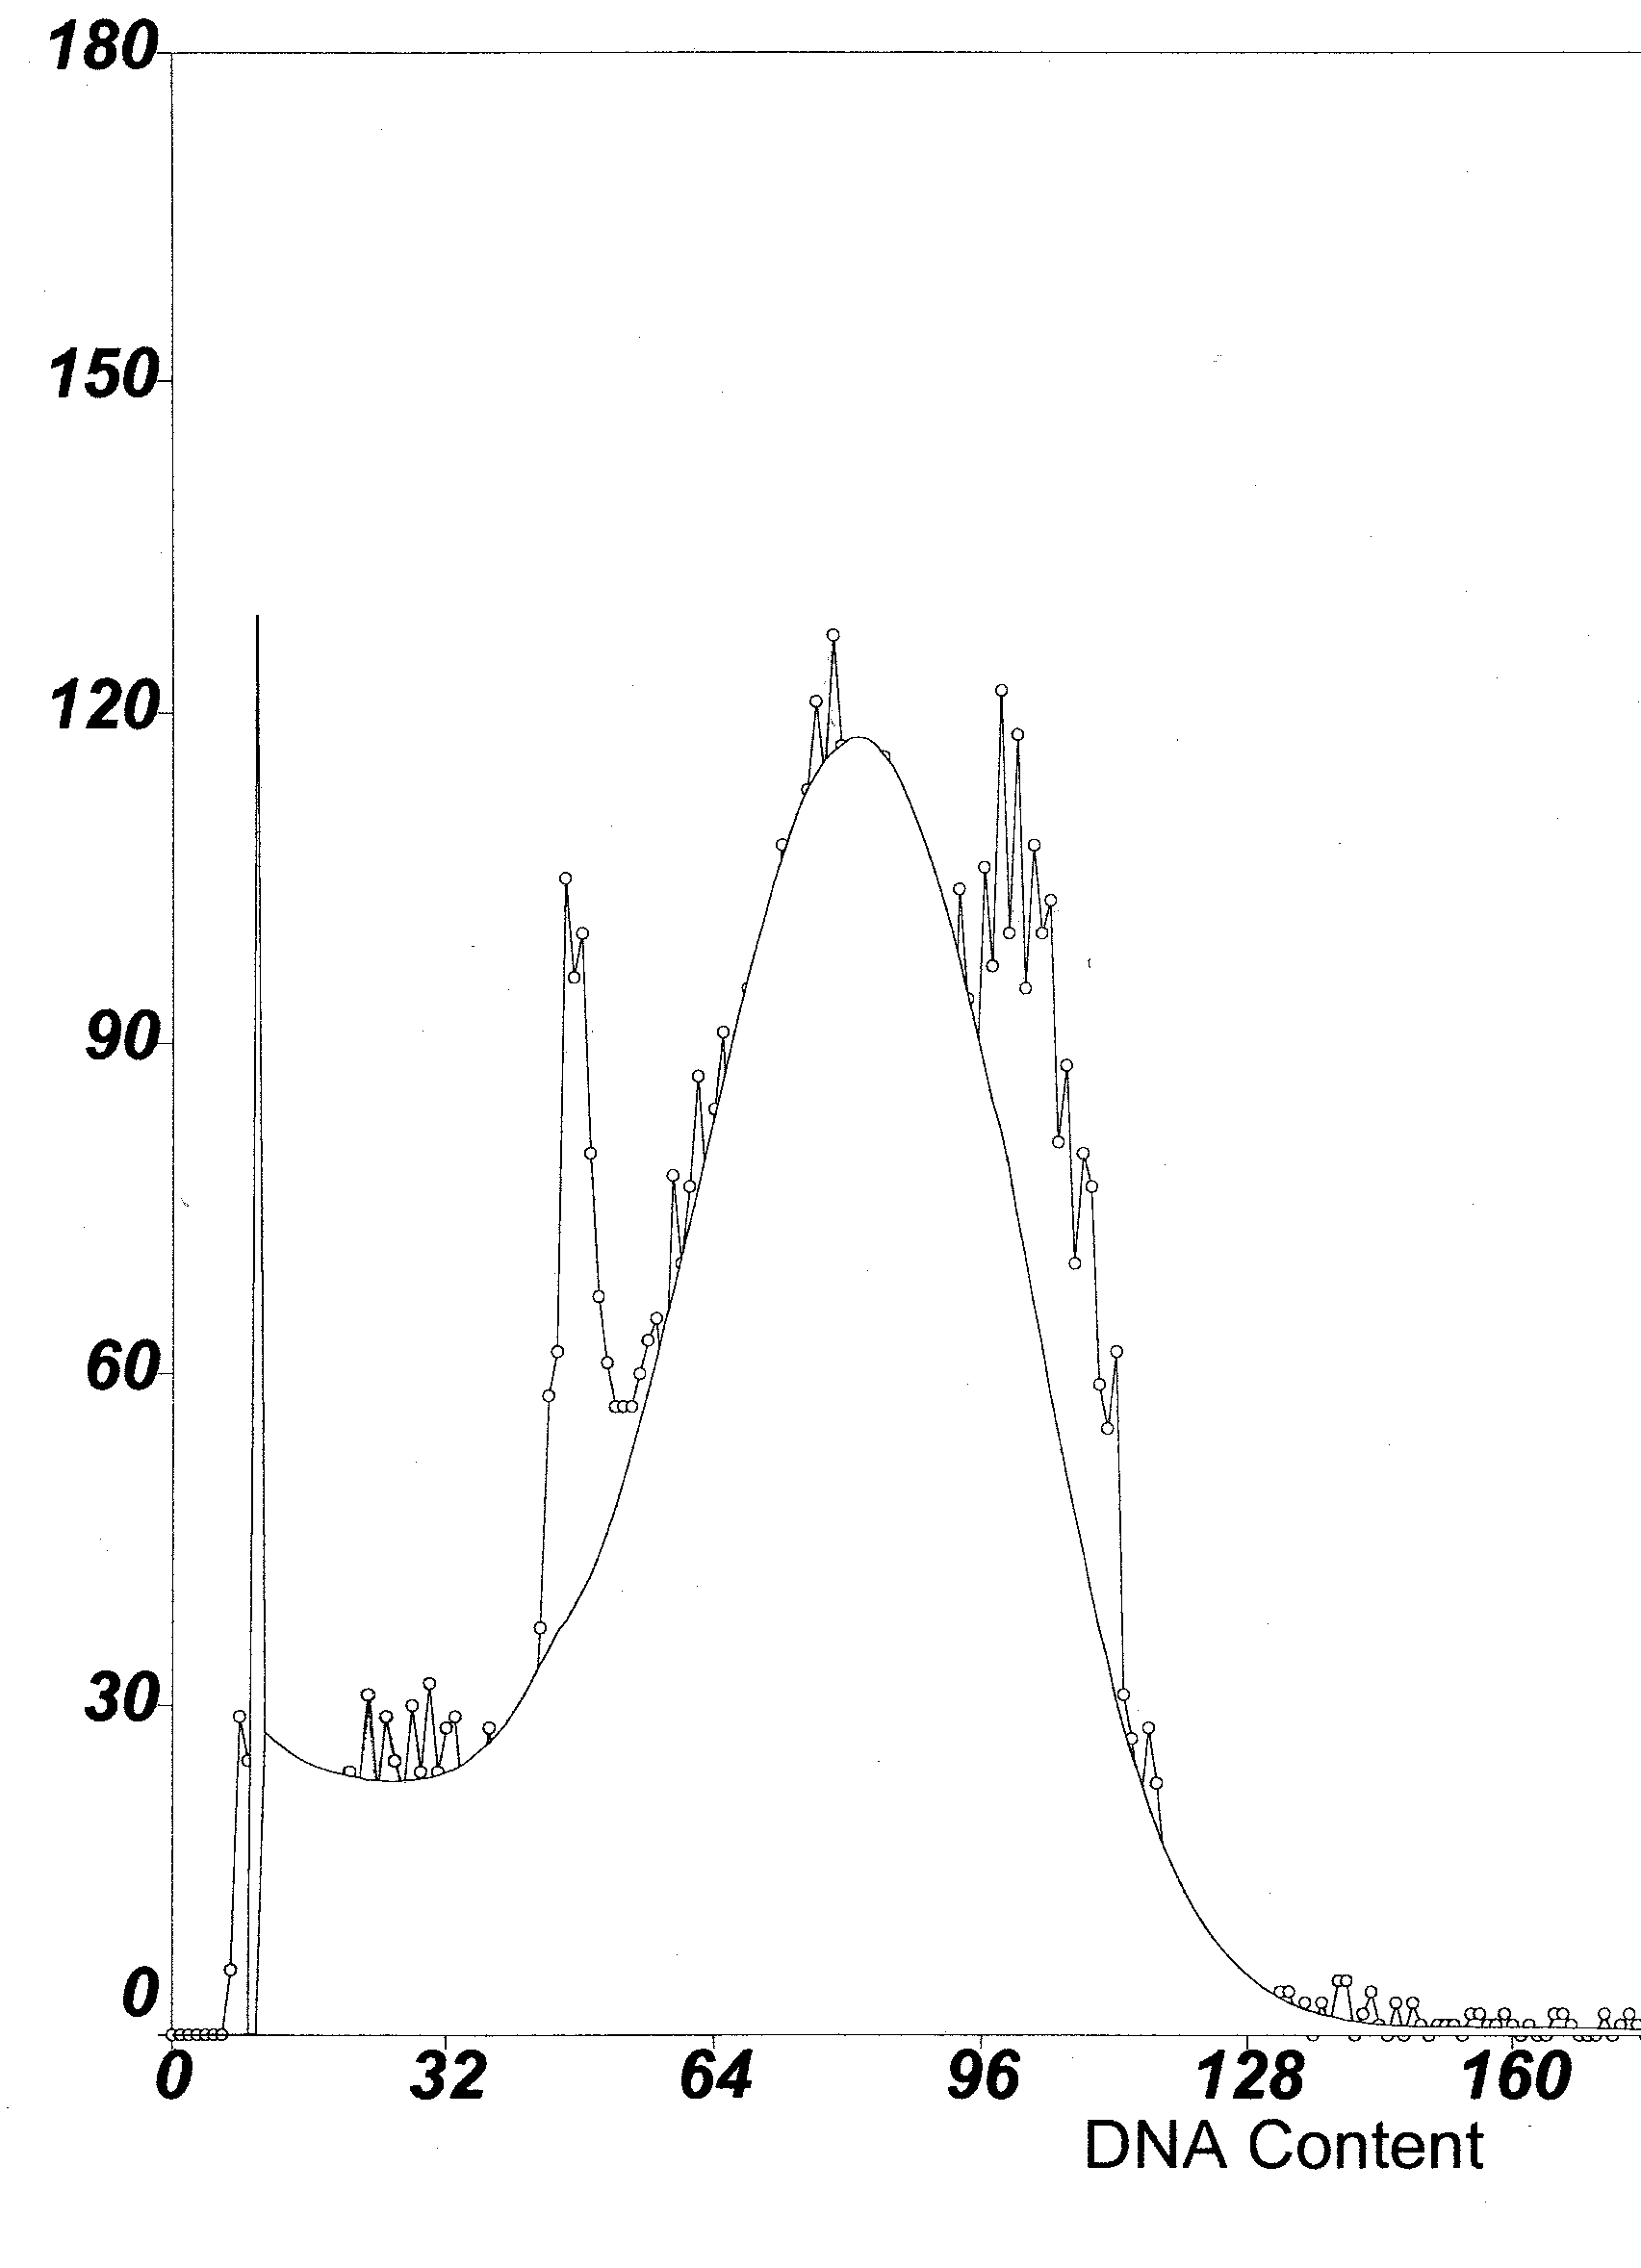


**B**
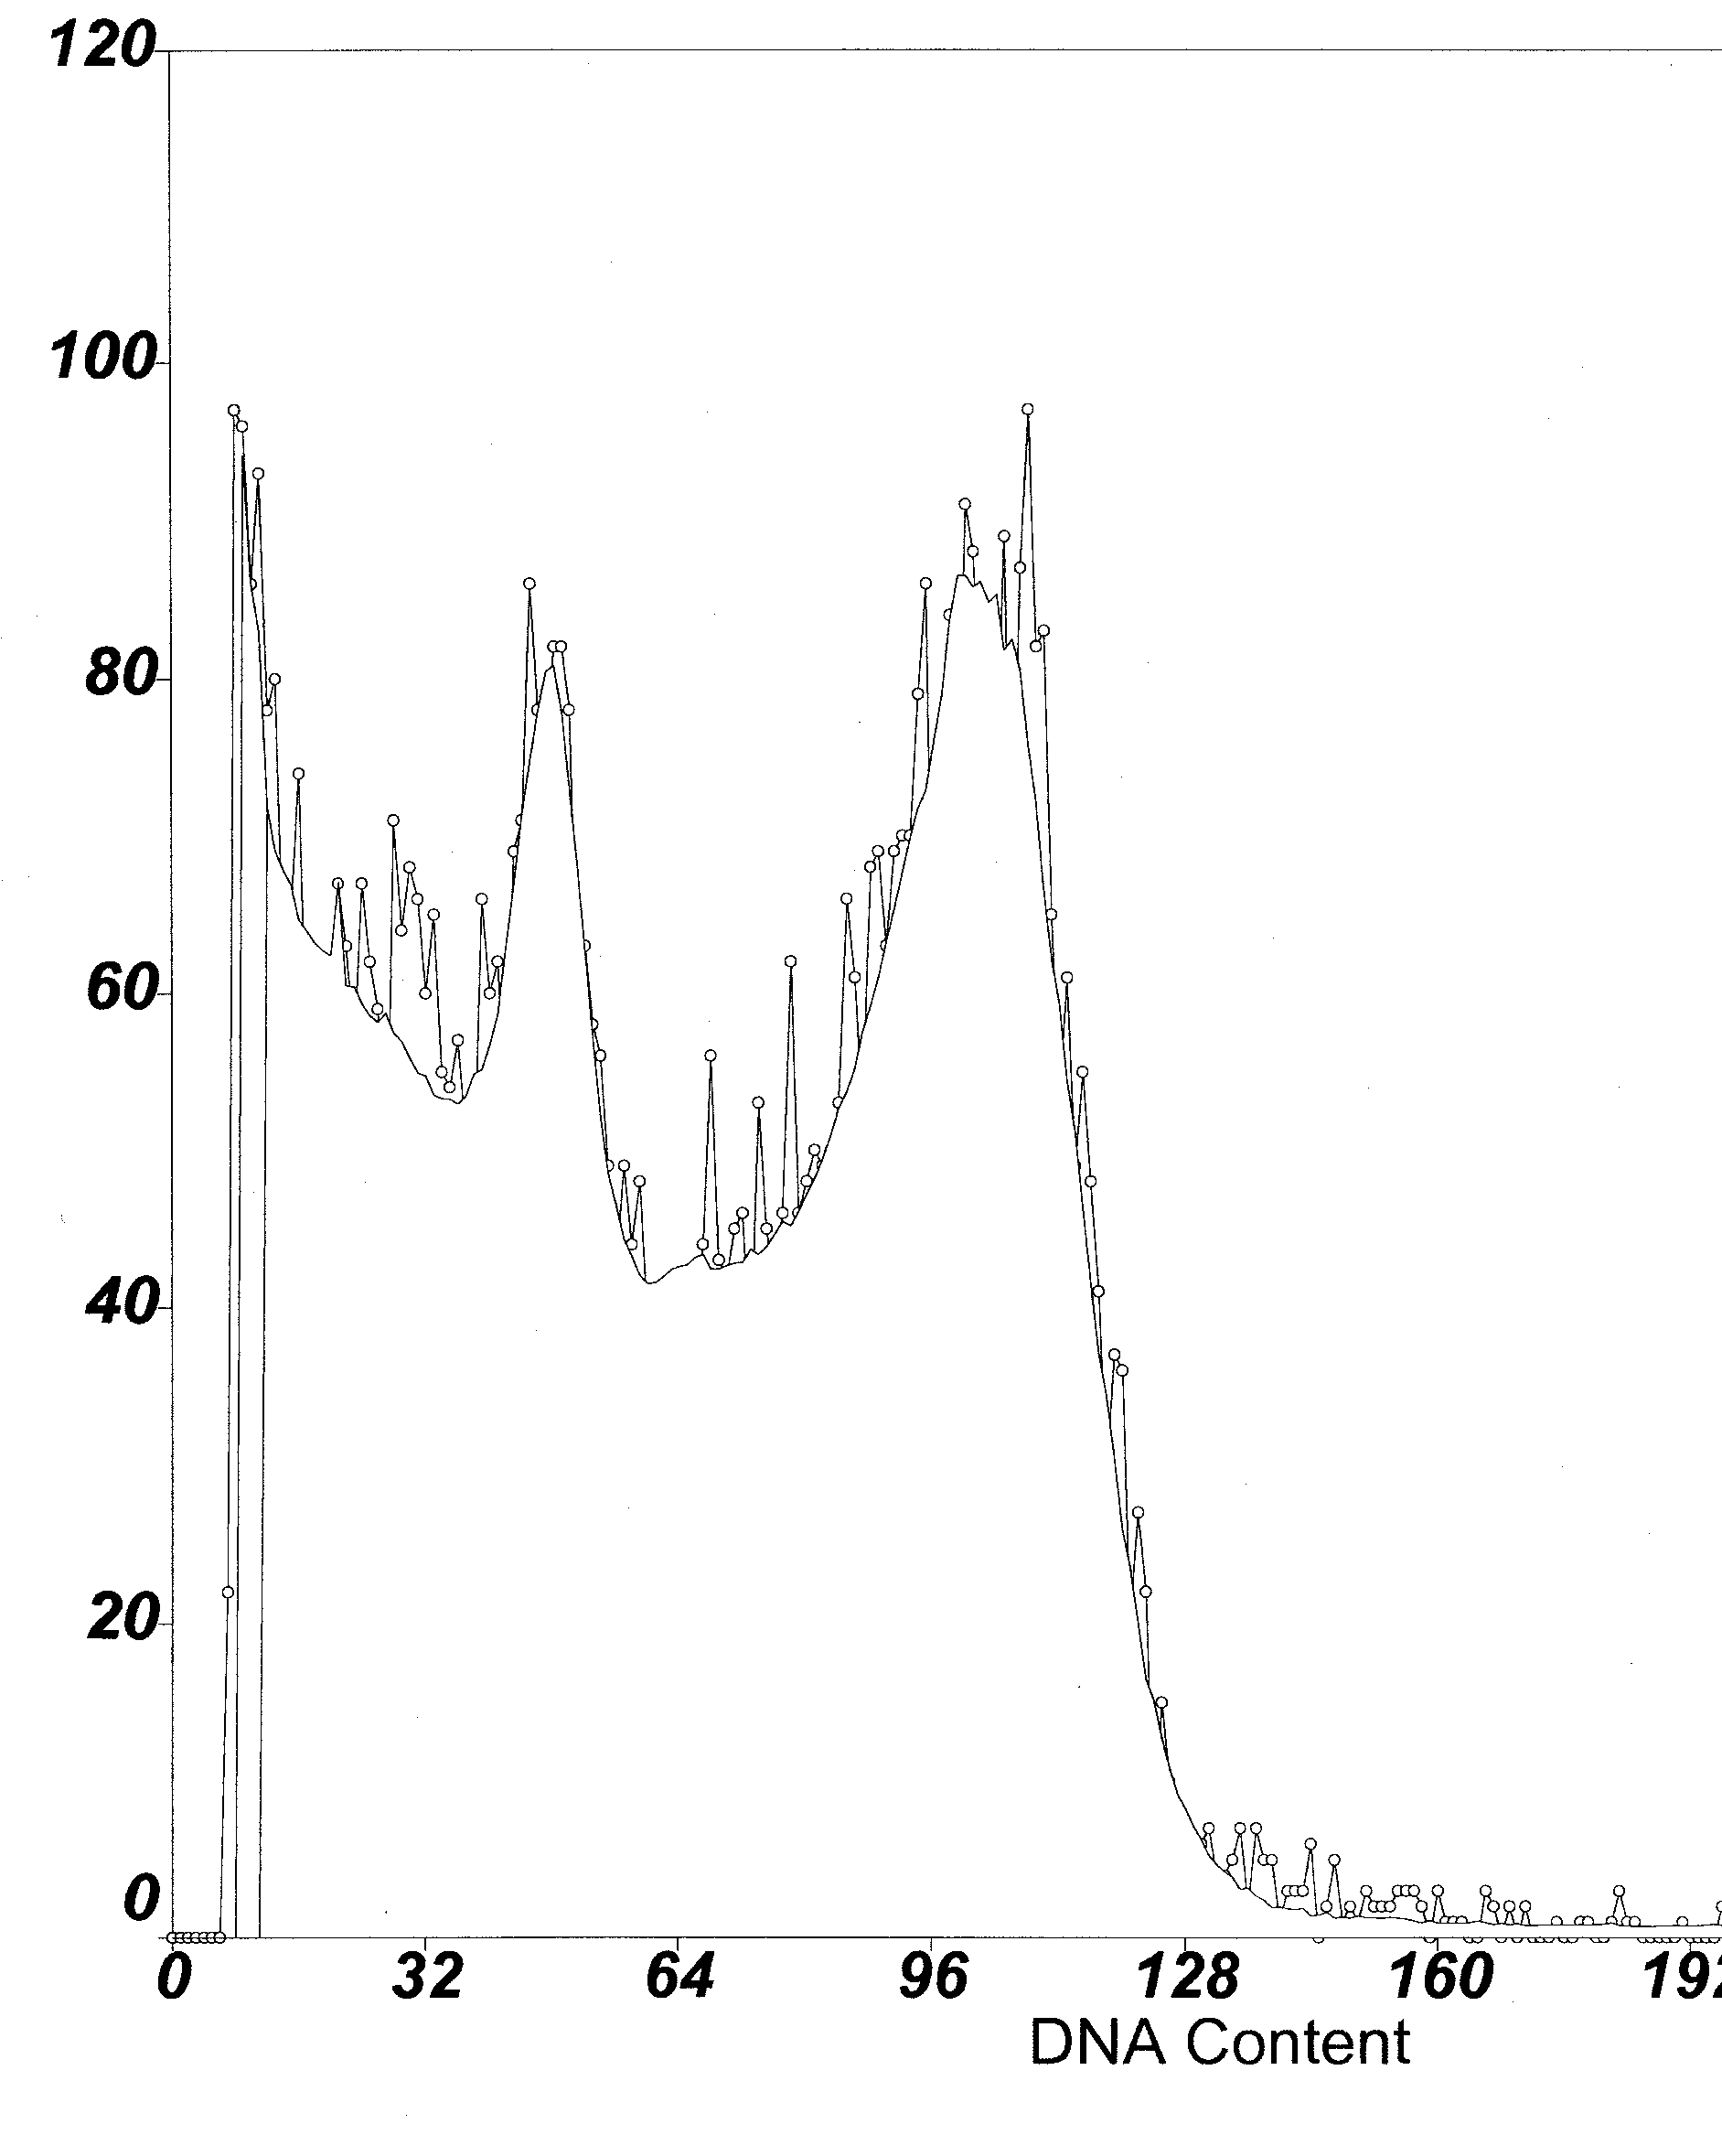


**D**
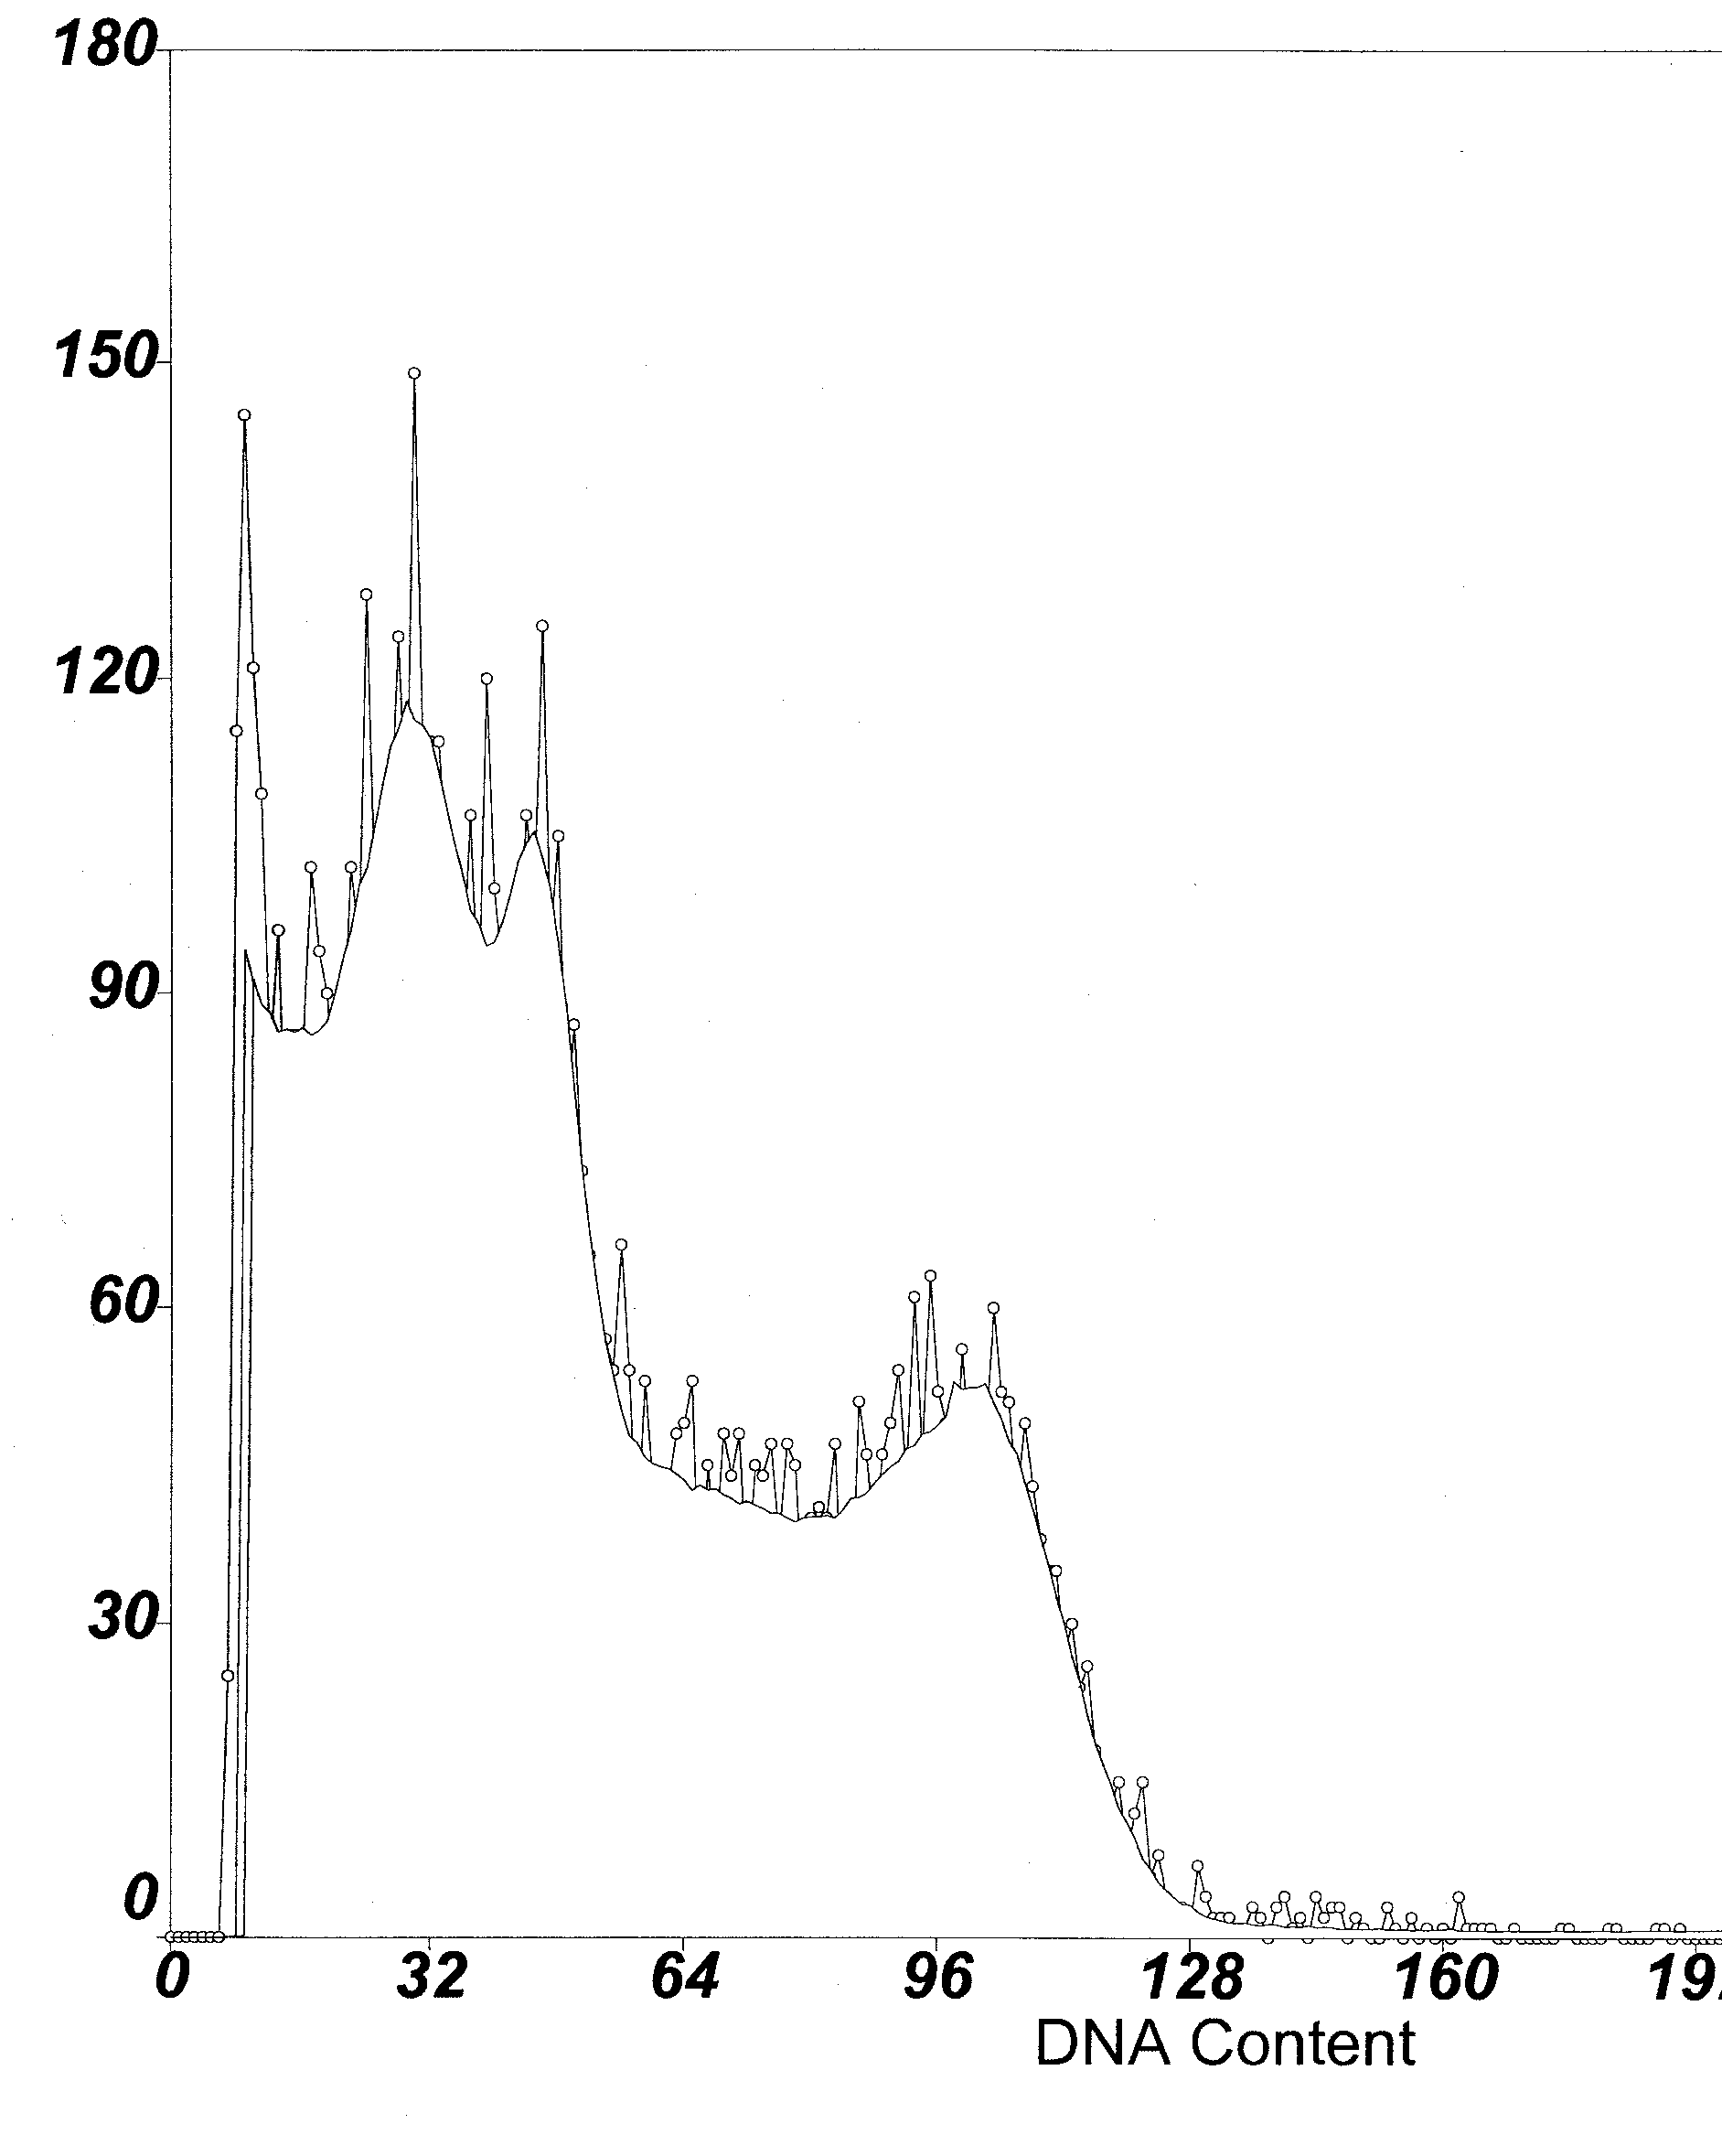


Figure S3


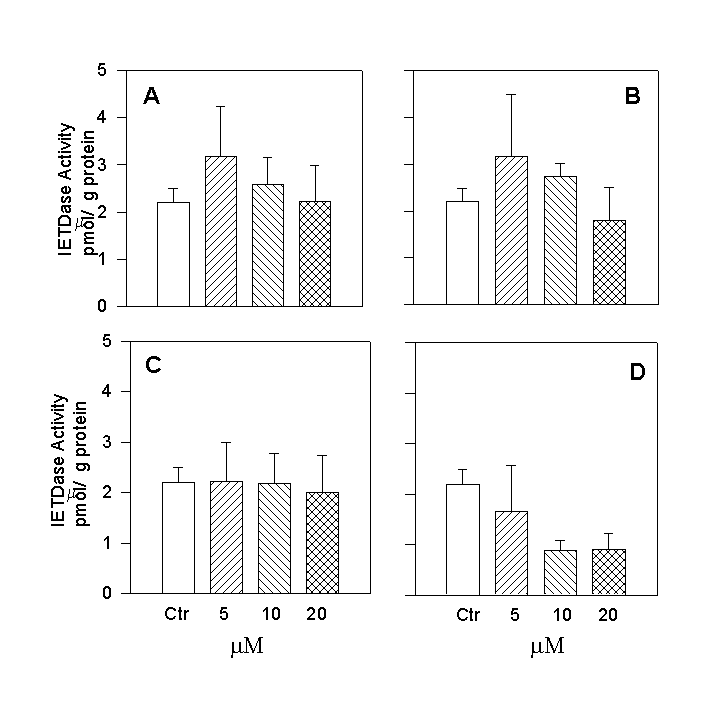


Figure S4

References

A. Guiotto, P. Rodighiero, P. Mancini, G. Pastorini, F. Bordin, F. Baccichetti, F. Carlassare, D. Vedaldi, F. Dall’Acqua, M. Tamaro, G. Recchia and M. Cristofolini. *J. Med. Chem*. 1984, **27**, 959.
